**Table S4.** Multivariate logistic regression model parameters, patients with major trauma analysed separately

|                            | Complete case analysis |         | Imputed values    |         |
|----------------------------|------------------------|---------|-------------------|---------|
|                            | OR (95% CI)            | P-value | OR (95% CI)       | P-value |
| <b>Cohort</b>              |                        |         |                   |         |
| Reference: 1998            | 1.00                   | .       | 1.00              | .       |
| 2002                       | 0.78 (0.41-1.50)       | 0.463   | 0.91 (0.53-1.59)  | 0.748   |
| 2011                       | 0.45 (0.30-0.67)       | <0.001  | 0.44 (0.30-0.66)  | <0.001  |
| <b>Male</b>                | 1.22 (0.70-2.13)       | 0.486   | 1.16 (0.68-2.01)  | 0.584   |
| <b>Age in years</b>        |                        |         |                   |         |
| Reference: <15             | 1.00                   | .       | 1.00              | .       |
| 15-55                      | 0.74 (0.37-1.47)       | 0.386   | 0.76 (0.38-1.51)  | 0.436   |
| >55                        | 1.51 (0.64-3.55)       | 0.343   | 1.51 (0.64-3.54)  | 0.343   |
| <b>Mechanism of injury</b> |                        |         |                   |         |
| Reference: Fall            | 1.00                   | .       | 1.00              | .       |
| Railway injury             | 3.28 (1.82-5.90)       | <0.001  | 3.42 (1.90-6.14)  | <0.001  |
| Road traffic injury        | 1.35 (0.74-2.47)       | 0.324   | 1.38 (0.76-2.51)  | 0.289   |
| Assault                    | 0.60 (0.18-1.99)       | 0.404   | 0.59 (0.18-1.96)  | 0.388   |
| Other                      | 1.46 (0.17-12.44)      | 0.731   | 1.05 (0.13-8.80)  | 0.964   |
| Unknown                    | 3.70 (1.24-11.07)      | 0.019   | 3.82 (1.28-11.41) | 0.017   |
| <b>ICISS</b>               | 0.93 (0.92-0.95)       | <0.001  | 0.93 (0.92-0.95)  | <0.001  |

Abbreviations: CI Confidence Interval, ICD International Classification of Disease, ICISS ICD-derived Injury Severity Score, OR Odds Ratio
