**Table S10.** Multivariate logistic regression model parameters, age>55 years analysed separately

|                             | <b>Complete case analysis</b> |                | <b>Imputed values</b> |                |
|-----------------------------|-------------------------------|----------------|-----------------------|----------------|
|                             | <b>OR (95% CI)</b>            | <b>P-value</b> | <b>OR (95% CI)</b>    | <b>P-value</b> |
| <b>Cohort</b>               |                               |                |                       |                |
| Reference: 1998             | 1.00                          | .              | 1.00                  | .              |
| 2002                        | 0.34 (0.11-1.09)              | 0.070          | 0.39 (0.13-1.21)      | 0.102          |
| 2011                        | 0.43 (0.17-1.10)              | 0.077          | 0.42 (0.17-1.07)      | 0.070          |
| <b>Male</b>                 | 2.80 (0.92-8.55)              | 0.071          | 2.74 (0.91-8.27)      | 0.074          |
| <b>Mechanism of injury*</b> |                               |                |                       |                |
| Reference: Fall             | 1.00                          | .              | 1.00                  | .              |
| Railway injury              | 1.81 (0.54-5.99)              | 0.334          | 1.92 (0.60-6.14)      | 0.271          |
| Road traffic injury         | 2.31 (0.82-6.51)              | 0.112          | 2.16 (0.79-5.89)      | 0.132          |
| <b>ICISS</b>                | 0.95 (0.91-0.99)              | 0.011          | 0.94 (0.91-0.98)      | 0.002          |

\*Assault, other and unknown categories dropped because of too few observations. Abbreviations: CI Confidence Interval, ICD International Classification of Disease, ICISS ICD-derived Injury Severity Score, OR Odds Ratio
